# Supplementary material for: Motivational Spillovers from Awards: Crowding Out in a Multitasking Environment
Source: Atypon-hosted journal article supplement (doi:10.1287/orsc.2016.1047), 2016-02-25

# Online Appendix for “Motivational Spillovers from Awards: Crowding Out in a Multitasking Environment”

**Table A1: Descriptive Statistics at the Worker/Month Level**

| <b>TREATMENT</b>               |     |                  |      |       |       |                     |       |      |       |       |
|--------------------------------|-----|------------------|------|-------|-------|---------------------|-------|------|-------|-------|
| Variable                       | Obs | <u>Pre-Award</u> |      |       |       | <u>Award Period</u> |       |      |       |       |
|                                |     | Mean             | Sd   | Min   | Max   | Obs                 | Mean  | Sd   | Min   | Max   |
| % time tardy per month         | 33  | 0.07             | 0.08 | 0.0   | 0.37  | 33                  | 0.06  | 0.06 | 0.0   | 0.19  |
| # minutes late per month       | 33  | -2.64            | 3.17 | -11.4 | 3.74  | 33                  | -3.63 | 2.91 | -9.67 | 0.21  |
| % time late per month          | 33  | 0.20             | 0.17 | 0.0   | 0.59  | 33                  | 0.16  | 0.15 | 0.0   | 0.47  |
| % time absent per month        | 33  | 0.02             | 0.02 | 0.0   | 0.08  | 33                  | 0.06  | 0.03 | 0.02  | 0.11  |
| % time single absent per month | 33  | 0.01             | 0.01 | 0.0   | 0.03  | 33                  | 0.03  | 0.02 | 0.0   | 0.11  |
| Average efficiency             | 32  | 122.1            | 22.4 | 87.5  | 168.0 | 32                  | 122.9 | 25.8 | 75.0  | 169.4 |

  

| <b>CONTROL</b>                 |     |                  |      |        |       |                     |       |      |       |       |
|--------------------------------|-----|------------------|------|--------|-------|---------------------|-------|------|-------|-------|
| Variable                       | Obs | <u>Pre-Award</u> |      |        |       | <u>Award Period</u> |       |      |       |       |
|                                |     | Mean             | Sd   | Min    | Max   | Obs                 | Mean  | Sd   | Min   | Max   |
| % time tardy per month         | 185 | 0.04             | 0.06 | 0.0    | 0.33  | 106                 | 0.05  | 0.11 | 0.0   | 1.0   |
| # minutes late per month       | 185 | -2.09            | 2.19 | -13.33 | 5.4   | 106                 | -1.51 | 2.45 | -10.5 | 8.31  |
| % time late per month          | 185 | 0.20             | 0.22 | 0.0    | 0.95  | 106                 | 0.24  | 0.20 | 0.0   | 1.0   |
| % time absent per month        | 185 | 0.05             | 0.08 | 0.0    | 0.50  | 106                 | 0.06  | 0.06 | 0.0   | 0.42  |
| % time single absent per month | 185 | 0.03             | 0.05 | 0.0    | 0.50  | 106                 | 0.03  | 0.03 | 0.0   | 0.11  |
| Average efficiency             | 174 | 110.0            | 30.3 | 54.5   | 217.8 | 99                  | 122.3 | 29.5 | 66.9  | 218.0 |

**Table A2: Placebo Tests**

| Variable       | Random Treatment Group (50) |         |          | Random Treatment Group and Date (50) |         |          |
|----------------|-----------------------------|---------|----------|--------------------------------------|---------|----------|
|                | Mean                        | p < 0.1 | p < 0.05 | Mean                                 | p < 0.1 | p < 0.05 |
|                | Coefficient                 |         |          | Coefficient                          |         |          |
| Tardy          | -0.0006                     | 6%      | 4%       | -0.0003                              | 14%     | 6%       |
| Minutes late   | -0.1182                     | 2%      | 2%       | -0.0969                              | 12%     | 4%       |
| Single absence | 0.0015                      | 6%      | 4%       | 0.0025                               | 12%     | 8%       |

Note: The average results of the placebo tests are shown above. For both types of placebos, the mean coefficient is both close to zero and significantly smaller than the corresponding coefficient from Table 3. Also, across the placebos the results are significant at close to the expected rate. We present the point estimate and 95% confidence intervals for each placebo regression of *minutes late* in Figure A1, which show that our point estimate has the smallest standard error of any of the individual placebos. Placebo regressions for our other models produced similar results. Overall, the placebo test results suggest that the treatment effects shown in Table 3 were actually a result of the treatment. The award program encouraged improved attendance behavior for workers in Plant 1, supporting Hypothesis 1. Standard errors in parentheses are clustered at the employee level. Significance levels: \* p<0.10, \*\* p<0.05, \*\*\* p<0.01.

Figure A1: Plant Process Flow Chart

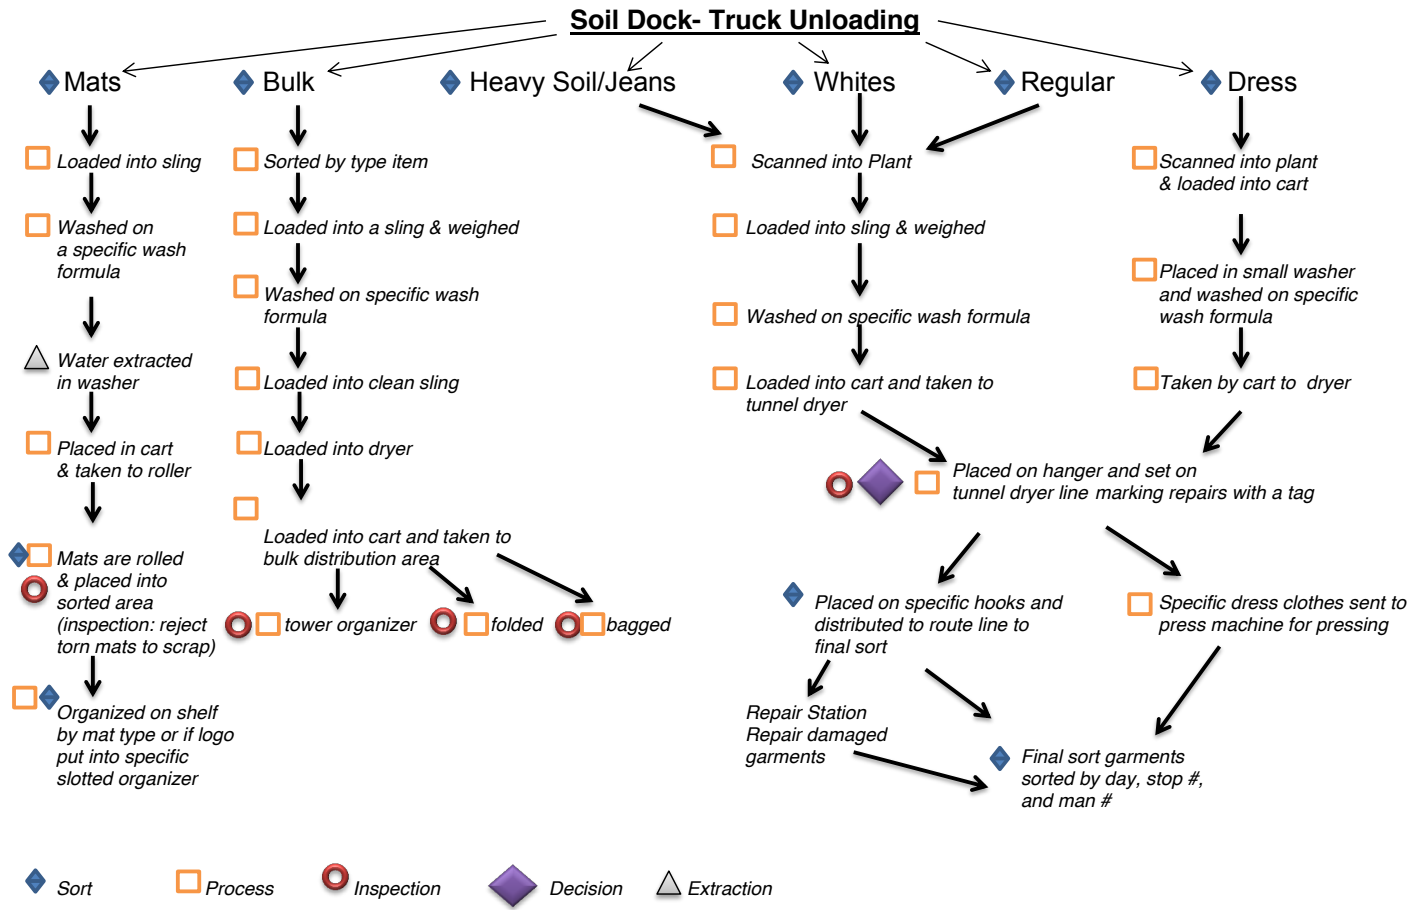

Figure A2: Histogram of Daily Efficiency for All Workers

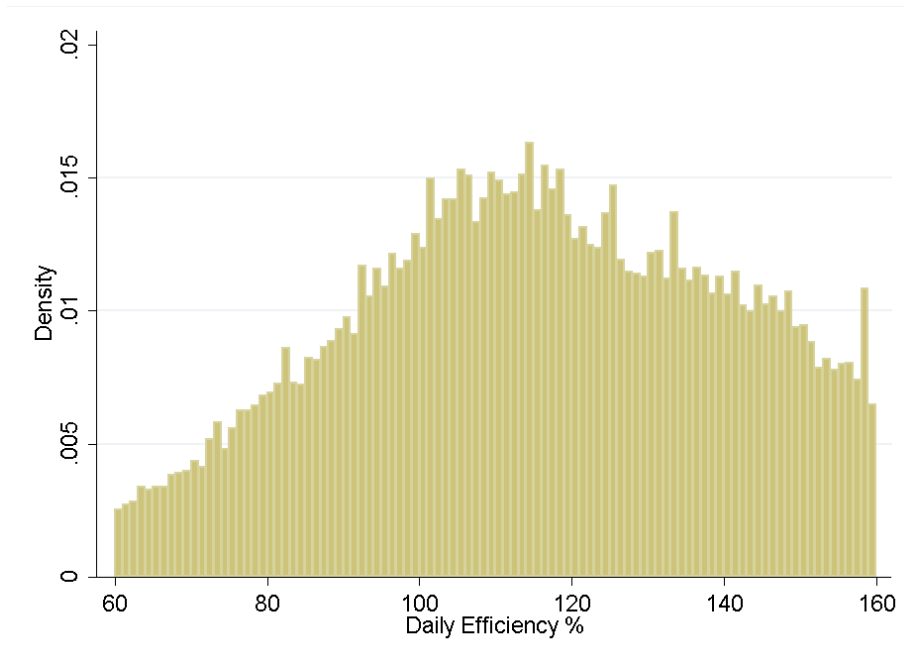

Figure A3: Eligible Months by Worker

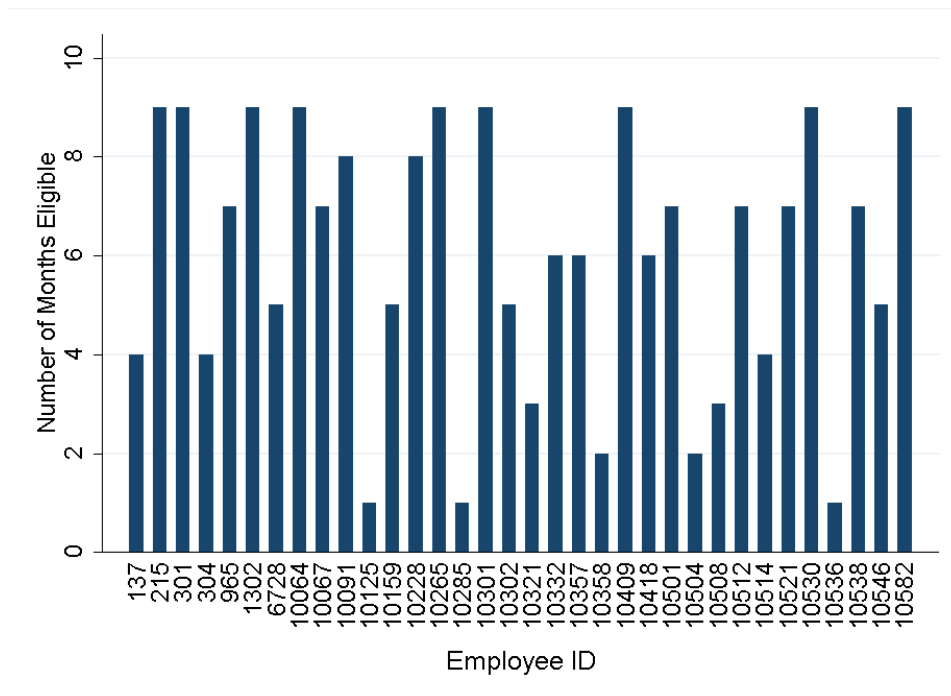

Supplement: orsc.2016.1047-sm-appendix.pdf [file orsc.2016.1047-sm-appendix.pdf]
